# Supplementary material for: Intrahospital Transport of Critically Ill Children to the Pediatric Intensive Care Unit: Implementation of Evidence-Based Clinical Practice Guidelines
Source: Research Square preprint supplement (doi:10.21203/rs.3.rs-7589123/v1), 2025-10-17
Supplement: Supplementary file 1 [file 649832818c33a2d42a652b19.docx]

**The interview guide included the following questions:**

1. Do you think that implementing the pediatric critical illness intrahospital transport process according to the guidelines conflicts with current nursing practices in your clinical work? Where specifically?
2. To what extent are you willing to implement the recommendations in the guidelines in a standardized manner in your clinical work?
3. What difficulties do you foresee in the clinical implementation of the recommendations in the guidelines?
4. How confident are you that you can implement intrahospital transport according to the best recommendations in the guidelines?
5. Do you think the existing assessment handover form can replace the preparation and handover checklists in the recommendations? If not, in what specific ways?
6. Is further training needed on existing intrahospital transport content? What specific areas require training?
7. What individual, departmental, or systemic approaches can help you complete the intrahospital transport process?
